# Supplementary material for: Life cycle assessment of low-dimensional materials for perovskite photovoltaic cells
Source: Royal Society of Chemistry journal article supplement (doi:10.1039/d3ya00540b), 2024-01-01
Supplement: d3ya00540b1.pdf [file d3ya00540b1.pdf]

## Supplementary Information

### Life Cycle Assessment of Low-Dimensional Materials for Perovskite Photovoltaic Cells

Achyuth Ravilla<sup>1</sup>, Carlo A.R. Perini<sup>2</sup>, Juan-Pablo Correa-Baena<sup>2</sup>, Anita W.Y. Ho-Baillie<sup>3</sup>, Ilke Celik<sup>1\*</sup>

<sup>1</sup> Department of Civil and Environmental Engineering, Portland State University, Portland, 97201, OR, USA.

<sup>2</sup> School of Material Science and Engineering, Georgia Institute of Technology, Atlanta, 30332, GA, USA.

<sup>3</sup> School of Physics and University of Sydney Nano Institute, The University of Sydney, Sydney, NSW 2006, Australia.

\*Corresponding author, Department of Mechanical and Material Engineering, Portland State University, Portland, 97201, OR, USA.

E-mail address: [ilke@pdx.edu](mailto:ilke@pdx.edu) (Ilke Celik).

- The environmental impacts attributed to 1g of each LD material analyzed in this study across ten TRACI impact categories are presented in Table S.1.
- The environmental impacts of the incorporation of the various LD materials in different layers of PSC have been calculated, and a comparative analysis of the environmental impacts for each LD material within every layer has been presented in Table S.2- S.4.
- LD materials that show lower environmental impacts in each layer have been chosen for Alt-1 *ld*-PSC configuration (highlighted in green in Table S.2-S.4), while those with higher impacts among the analyzed LD materials have been selected for the Alt-2 *ld*-PSC (highlighted in red in Table S2-S4).
- The environmental impacts of PSCs for 1 m<sup>2</sup> are provided in Table S.5.
- The Energy Payback Time (EPBT) calculations were performed using Eq. S1 follows an approach similar to Celik et al<sup>1</sup>.
- The improved photovoltaic parameters after the incorporation of LD materials into various layers of the PSC structure are provided in Table S.6.
- Table S.7 provides the environmental impacts comparison of organic HTL i.e., spiro-OMeTAD, and inorganic HTL i.e., CuSCN for 1m<sup>2</sup> of PSC.
- Table S.8 provides an environmental impact comparison between two Alt-1 configurations, one with spiro-OMeTAD as HTL and the other employing CuSCN as HTL. In both of these Alt-1 configurations, the HTL integrates rGO, the ETL includes graphene, and the

absorber layer with BP-nano. Our results show that the environmental performance of the spiro-OMeTAD-based Alt-1 and CuSCN-based Alt-1 are similar.

**Table S.1.** Environmental impacts attributed to materials and energy utilized in the synthesis of 1g of various LD materials across all TRACI impact categories.

| TRACI impact categories                     | rGO       |          | Graphene  |          | GQDs      |          | BP-nano   |          | MoS <sub>2</sub> |          |
|---------------------------------------------|-----------|----------|-----------|----------|-----------|----------|-----------|----------|------------------|----------|
|                                             | Materials | Energy   | Materials | Energy   | Materials | Energy   | Materials | Energy   | Materials        | Energy   |
| Acidification (kg SO <sub>2</sub> -eq)      | 3.28E-04  | 3.06E-06 | 1.91E-05  | 7.08E-04 | 4.05E-02  | 1.97E-01 | 2.18E-01  | 4.81E-02 | 1.47E-02         | 1.15E-05 |
| Ecotoxicity (CTUe)                          | 4.08E+00  | 8.71E-03 | 6.58E-02  | 2.01E+00 | 5.70E+01  | 8.22E+02 | 3.83E+02  | 2.00E+02 | 8.98E+01         | 4.80E-02 |
| Eutrophication (kg N-eq)                    | 1.98E-04  | 6.39E-06 | 1.13E-05  | 1.48E-03 | 8.21E-03  | 6.52E-01 | 2.02E-01  | 1.59E-01 | 1.04E-02         | 3.81E-05 |
| GWP (kg CO <sub>2</sub> -eq)                | 3.27E-02  | 1.10E-03 | 3.53E-03  | 2.55E-01 | 2.28E+00  | 8.65E+01 | 4.58E+01  | 2.11E+01 | 2.06E+00         | 5.05E-03 |
| Particulate Air (kg PM <sub>2.5</sub> - eq) | 9.22E-05  | 2.69E-06 | 6.45E-06  | 6.23E-04 | 5.51E-03  | 2.94E-01 | 1.01E-01  | 7.17E-02 | 2.67E-03         | 1.72E-05 |
| Human toxicity, cancer (CTUh)               | 3.40E-09  | 7.80E-11 | 3.52E-10  | 1.80E-08 | 2.60E-07  | 7.52E-06 | 3.34E-06  | 1.83E-06 | 1.36E-07         | 4.40E-10 |
| Human toxicity, non-canc. (CTUh)            | 2.94E-08  | 2.64E-10 | 1.36E-09  | 6.10E-08 | 1.00E-06  | 2.45E-05 | 1.15E-05  | 5.97E-06 | 6.32E-07         | 1.43E-09 |
| Ozone Depletion Air (kg CFC 11-eq)          | 9.26E-09  | 6.66E-11 | 4.12E-10  | 1.54E-08 | 2.21E-07  | 4.97E-06 | 3.24E-06  | 1.21E-06 | 3.24E-07         | 2.90E-10 |
| Resources, Fossil fuels (MJ surplus energy) | 3.72E-02  | 1.07E-03 | 3.72E-03  | 2.48E-01 | 3.19E+00  | 8.06E+01 | 5.12E+01  | 1.97E+01 | 3.95E+00         | 4.71E-03 |
| Smog Air (kg O <sub>3</sub> -eq)            | 2.47E-03  | 3.08E-05 | 2.53E-04  | 7.11E-03 | 1.50E-01  | 2.81E+00 | 2.99E+00  | 6.87E-01 | 1.14E-01         | 1.64E-04 |

**Table S.2** Environmental impacts of graphene, BPQDs, and GQDs integrated into ETL per m<sup>2</sup> of *ld*-PSC. The LD material highlighted in green indicates lower environmental impact, while the LD material highlighted in red shows higher environmental impacts for ETL integration.

| TRACI impact categories                     | Graphene | BPQDs    | GQDs     |
|---------------------------------------------|----------|----------|----------|
| Acidification (kg SO <sub>2</sub> -eq)      | 9.66E-05 | 8.45E-04 | 1.24E-03 |
| Ecotoxicity (CTUe)                          | 1.73E-01 | 1.83E+00 | 4.59E+00 |
| Eutrophication (kg N-eq)                    | 9.76E-05 | 1.12E-03 | 3.45E-03 |
| GWP (kg CO <sub>2</sub> -eq)                | 2.07E-02 | 2.09E-01 | 4.63E-01 |
| Particulate Air (kg PM <sub>2.5</sub> - eq) | 2.48E-05 | 5.24E-04 | 1.56E-03 |
| Human toxicity, cancer (CTUh)               | 1.59E-09 | 1.62E-08 | 4.06E-08 |
| Human toxicity, non-canc. (CTUh)            | 4.98E-09 | 5.46E-08 | 1.33E-07 |
| Ozone Depletion Air (kg CFC 11-eq)          | 6.99E-10 | 1.35E-08 | 2.71E-08 |
| Resources, Fossil fuels (MJ surplus energy) | 4.95E-02 | 2.39E-01 | 4.37E-01 |
| Smog air (kg O <sub>3</sub> -eq)            | 1.19E-03 | 1.16E-02 | 1.55E-02 |
| CED (MJ)                                    | 6.00E-01 | 4.66E+00 | 9.99E+00 |

**Table S.3** Environmental impacts of GQDs, BP-nano, and rGO integrated into absorber layer per m<sup>2</sup> of *ld*-PSC. The LD material highlighted in green indicates a lower environmental impact, while the LD material highlighted in red shows higher environmental impacts for absorber layer integration.

| TRACI impact categories                     | GQDs     | BP-nano  | rGO      |
|---------------------------------------------|----------|----------|----------|
| Acidification (kg SO <sub>2</sub> -eq)      | 1.22E-02 | 1.60E-03 | 2.43E-01 |
| Ecotoxicity (CTUe)                          | 4.25E+01 | 2.34E+00 | 2.27E+02 |
| Eutrophication (kg N-eq)                    | 3.17E-02 | 1.39E-03 | 1.22E-01 |
| GWP (kg CO <sub>2</sub> -eq)                | 4.27E+00 | 2.46E-01 | 1.93E+01 |
| Particulate Air (kg PM <sub>2.5</sub> - eq) | 1.42E-02 | 5.21E-04 | 1.96E-02 |
| Human toxicity, cancer (CTUh)               | 3.72E-07 | 1.81E-08 | 1.24E-06 |
| Human toxicity, non-canc. (CTUh)            | 1.22E-06 | 6.15E-08 | 4.35E-06 |
| Ozone Depletion Air (kg CFC 11-eq)          | 2.62E-07 | 2.53E-08 | 3.71E-06 |
| Resources, Fossil fuels (MJ surplus energy) | 4.22E+00 | 3.96E-01 | 5.68E+01 |
| Smog air (kg O <sub>3</sub> -eq)            | 1.45E-01 | 1.33E-02 | 9.96E-01 |
| CED (MJ)                                    | 9.27E+01 | 5.86E+00 | 5.55E+02 |

**Table S.4** Environmental impacts of rGO, MoS<sub>2</sub>, and BP-nano integrated into HTL per m<sup>2</sup> of *ld*-PSC. The LD material highlighted in green indicates a lower environmental impact, while the LD material highlighted in red shows higher environmental impacts for HTL integration.

| TRACI impact categories                     | rGO      | MoS <sub>2</sub> | BP-nano  |
|---------------------------------------------|----------|------------------|----------|
| Acidification (kg SO <sub>2</sub> -eq)      | 1.34E-04 | 9.40E-03         | 1.61E-02 |
| Ecotoxicity (CTUe)                          | 5.92E-01 | 4.06E+01         | 3.54E+01 |
| Eutrophication (kg N-eq)                    | 4.24E-04 | 7.11E-03         | 2.18E-02 |
| GWP (kg CO <sub>2</sub> -eq)                | 5.46E-02 | 1.80E+00         | 4.04E+00 |
| Particulate Air (kg PM <sub>2.5</sub> - eq) | 1.78E-04 | 1.66E-03         | 1.04E-02 |
| Human toxicity, cancer (CTUh)               | 4.74E-09 | 9.87E-08         | 3.12E-07 |
| Human toxicity, non-canc. (CTUh)            | 1.53E-08 | 4.72E-07         | 1.06E-06 |
| Ozone Depletion Air (kg CFC 11-eq)          | 3.80E-09 | 1.44E-07         | 2.68E-07 |
| Resources, Fossil fuels (MJ surplus energy) | 5.84E-02 | 5.27E+00         | 4.35E+00 |
| Smog air (kg O <sub>3</sub> -eq)            | 1.91E-03 | 9.97E-02         | 2.22E-01 |
| CED (MJ)                                    | 1.22E+00 | 4.95E+01         | 8.86E+01 |

**Table S.5** Environmental impacts of PSCs for 1m<sup>2</sup> of module across all TRACI impact categories.

| TRACI impact categories                     | PSC      | Alt-1    | Alt-2    |
|---------------------------------------------|----------|----------|----------|
| Acidification (kg SO <sub>2</sub> -eq)      | 3.45E-01 | 3.47E-01 | 6.06E-01 |
| Ecotoxicity (CTUe)                          | 5.83E+03 | 5.83E+03 | 6.09E+03 |
| Eutrophication (kg N-eq)                    | 2.46E-01 | 2.48E-01 | 3.93E-01 |
| GWP (kg CO <sub>2</sub> -eq)                | 3.64E+01 | 3.67E+01 | 6.02E+01 |
| Particulate Air (kg PM <sub>2.5</sub> - eq) | 8.14E-02 | 8.19E-02 | 1.13E-01 |
| Human toxicity, cancer (CTUh)               | 7.63E-06 | 7.65E-06 | 9.22E-06 |
| Human toxicity, non-canc. (CTUh)            | 6.18E-05 | 6.19E-05 | 6.73E-05 |
| Ozone Depletion Air (kg CFC 11-eq)          | 3.73E-06 | 3.76E-06 | 7.74E-06 |
| Resources, Fossil fuels (MJ surplus energy) | 4.94E+01 | 4.98E+01 | 1.11E+02 |
| Smog air (kg O <sub>3</sub> -eq)            | 3.97E+00 | 3.99E+00 | 5.21E+00 |
| CED (MJ)                                    | 6.72E+02 | 6.80E+02 | 1.33E+03 |

**Table S.6** Photovoltaic parameters of PSC structure after incorporation of various LD materials into ETL, the absorber layer, and HTL.

| PSC layer      | LD material integration | Jsc (mA/cm <sup>2</sup> ) | V <sub>oc</sub> (V) | FF (%) | η (%) | Reference |
|----------------|-------------------------|---------------------------|---------------------|--------|-------|-----------|
| ETL            | Graphene                | 23.21                     | 1.08                | 69.0   | 17.4  | 2         |
|                | GQDs                    | 22.97                     | 1.13                | 75.4   | 19.7  | 3         |
|                | BPQDs                   | 24.4                      | 1.13                | 76.1   | 21.0  | 4         |
| Absorber layer | BP-nano                 | 22.95                     | 1.06                | 80.0   | 19.7  | 5         |
|                | rGO                     | 17.67                     | 0.93                | 70.0   | 11.6  | 6         |
|                | GQDs                    | 22.91                     | 1.05                | 76.3   | 18.4  | 7         |
| HTL            | BP-nano                 | 20.22                     | 1.06                | 76.1   | 16.4  | 8         |
|                | MoS <sub>2</sub>        | 21.70                     | 1.12                | 72.0   | 17.5  | 9         |
|                | rGO                     | 23.05                     | 1.11                | 71.0   | 18.2  | 10        |

### Conversion of Impacts<sub>kWh</sub> to Impacts<sub>m2</sub>

$$Impacts_{kWh} = \frac{Impacts_{m^2}}{I * PCE * PR * Lt} \quad Eq. S1$$

where impacts<sub>m2</sub> represents the environmental impacts of 1m<sup>2</sup> of module area manufacturing; impacts<sub>kWh</sub> is the impacts per kWh electricity generation from PV module; I denote the solar insolation constant (1700 kWh/m<sup>2</sup>/year); PR is the performance ratio of the module (75%); Lt is the lifetime of the PV modules (years).

### Energy Payback Time (EPBT)

$$EPBT = \frac{CED * \epsilon}{I * \eta * PR * CF} \quad Eq. S2$$

where CED represents the cumulative energy demand ( $\text{MJ}/\text{m}^2$ ),  $\varepsilon$  is the electrical to primary energy conversion factor (35%), PR is the performance ratio (75%),  $\eta$  is the PCE (%) of PV technology,  $I$  denote the global irradiation constant ( $1700 \text{ kWh}/\text{m}^2/\text{year}$ ), and CF is the conversion factor ( $3.6\text{MJ}/\text{kWh}$ ).

### Low-cost inorganic HTL (CuSCN)

**Table S.7** Environmental impacts comparison of organic HTL i.e., spiro-OMeTAD, and inorganic HTL i.e., CuSCN for  $1\text{m}^2$  of PSC. Note: The thickness of CuSCN is 40nm and spiro-OMeTAD is 150nm.

| TRACI impact categories                     | CuSCN    | spiro-OMeTAD |
|---------------------------------------------|----------|--------------|
| Acidification (kg $\text{SO}_2$ -eq)        | 1.58E-04 | 9.33E-07     |
| Ecotoxicity (CTUe)                          | 2.46E-01 | 1.74E-03     |
| Eutrophication (kg N-eq)                    | 2.82E-04 | 5.43E-07     |
| GWP (kg $\text{CO}_2$ -eq)                  | 2.73E-02 | 2.32E-04     |
| Particulate Air (kg $\text{PM}_{2.5}$ - eq) | 1.77E-05 | 2.15E-07     |
| Human toxicity, cancer (CTUh)               | 2.08E-09 | 1.19E-11     |
| Human toxicity, non-canc. (CTUh)            | 8.33E-09 | 3.76E-11     |
| Ozone Depletion Air (kg CFC 11-eq)          | 4.08E-09 | 2.32E-11     |
| Resources, Fossil fuels (MJ surplus energy) | 3.19E-02 | 8.80E-04     |
| Smog air (kg $\text{O}_3$ -eq)              | 1.20E-03 | 1.24E-05     |
| CED (MJ)                                    | 6.01E-01 | 7.44E-03     |

**Table S.8** Environmental impacts comparison between two Alt-1 *ld*-PSC configurations, one incorporates organic HTL spiro-OMeTAD and the other using inorganic HTL CuSCN for 1kWh electricity production. In two Alt-1 configurations, ETL is integrated with graphene and absorber layer with BP-nano. We substituted spiro-OMeTAD with inorganic CuSCN for the HTL and following a previous study<sup>11</sup> that incorporated rGO on CuSCN, we calculated the environmental impacts.

| TRACI impact categories                     | Alt-1 with spiro-OMeTAD+rGO | Alt-1 with CuSCN+rGO |
|---------------------------------------------|-----------------------------|----------------------|
| Acidification (kg $\text{SO}_2$ -eq)        | 4.30E-05                    | 4.31E-05             |
| Ecotoxicity (CTUe)                          | 7.23E-01                    | 7.23E-01             |
| Eutrophication (kg N-eq)                    | 3.07E-05                    | 3.08E-05             |
| GWP (kg $\text{CO}_2$ -eq)                  | 4.55E-03                    | 4.56E-03             |
| Particulate Air (kg $\text{PM}_{2.5}$ - eq) | 1.02E-05                    | 1.02E-05             |
| Human toxicity, cancer (CTUh)               | 9.49E-10                    | 9.50E-10             |
| Human toxicity, non-canc. (CTUh)            | 7.67E-09                    | 7.67E-09             |
| Ozone Depletion Air (kg CFC 11-eq)          | 4.66E-10                    | 4.67E-10             |
| Resources, Fossil fuels (MJ surplus energy) | 6.18E-03                    | 6.20E-03             |
| Smog air (kg $\text{O}_3$ -eq)              | 4.94E-04                    | 4.95E-04             |
| CED (MJ)                                    | 8.43E-02                    | 8.44E-02             |

## Environmental impact comparison between regular and inverted PSCs after the incorporation of LD materials

- Table S.9 provides the environmental impact comparison between Alt-1 *ld*-PSC and an inverted *ld*-PSC configuration. The inverted *ld*-PSC includes BPQDs additional coating on the top of PEDOT: PSS. Following previous study<sup>12</sup>, we assumed a 15% increase in the PCE value for the inverted *ld*-PSC after the integration of BPQDs.

**Table S.9** Environmental impacts comparison between Alt-1 *ld*-PSC configuration and inverted *ld*-PSC with PEDOT: PSS as HTL and PCBM as ETL. In inverted PSC, BPQDs were applied on the PEDOT: PSS to enhance the hole extraction in p-i-n PSC structure.

| TRACI impact categories                     | Alt-1 PSC | Inverted PSC<br>PEDOT: PSS<br>+BPQDs |
|---------------------------------------------|-----------|--------------------------------------|
| Acidification (kg SO <sub>2</sub> -eq)      | 4.30E-05  | 4.44E-05                             |
| Ecotoxicity (CTUe)                          | 7.23E-01  | 7.26E-01                             |
| Eutrophication (kg N-eq)                    | 3.07E-05  | 3.29E-05                             |
| GWP (kg CO <sub>2</sub> -eq)                | 4.55E-03  | 4.98E-03                             |
| Particulate Air (kg PM <sub>2.5</sub> - eq) | 1.02E-05  | 1.05E-05                             |
| Human toxicity, cancer (CTUh)               | 9.49E-10  | 9.70E-10                             |
| Human toxicity, non-canc. (CTUh)            | 7.67E-09  | 7.71E-09                             |
| Ozone Depletion Air (kg CFC 11-eq)          | 4.66E-10  | 5.33E-10                             |
| Resources, Fossil fuels (MJ surplus energy) | 6.18E-03  | 7.50E-03                             |
| Smog air (kg O <sub>3</sub> -eq)            | 4.94E-04  | 5.12E-04                             |
| CED (MJ)                                    | 8.43E-02  | 8.72E-02                             |

### References:

- 1 I. Celik, A. B. Phillips, Z. Song, Y. Yan, R. J. Ellingson, M. J. Heben and D. Apul, Environmental analysis of perovskites and other relevant solar cell technologies in a tandem configuration, *Energy Environ. Sci.*, 2017, **10**, 1874–1884.
- 2 M. Zhu, W. Liu, W. Ke, L. Xie, P. Dong and F. Hao, Graphene-Modified Tin Dioxide for Efficient Planar Perovskite Solar Cells with Enhanced Electron Extraction and Reduced Hysteresis, *ACS Appl. Mater. Interfaces*, 2019, **11**, 666–673.
- 3 J. Xie, K. Huang, X. Yu, Z. Yang, K. Xiao, Y. Qiang, X. Zhu, L. Xu, P. Wang, C. Cui and D. Yang, Enhanced Electronic Properties of SnO<sub>2</sub> via Electron Transfer from Graphene Quantum Dots for Efficient Perovskite Solar Cells, *ACS Nano*, 2017, **11**, 9176–9182.
- 4 B. Gu, Y. Du, B. Chen, R. Zhao, H. Lu, Q. Xu and C. Guo, Black Phosphorus Quantum Dot-Engineered Tin Oxide Electron Transport Layer for Highly Stable Perovskite Solar Cells with Negligible Hysteresis, *ACS Appl. Mater. Interfaces*, 2022, **14**, 11264–11272.
- 5 Y. Wang, H. Zhang, T. Zhang, W. Shi, M. Kan, J. Chen and Y. Zhao, Photostability of MAPbI<sub>3</sub>

- Perovskite Solar Cells by Incorporating Black Phosphorus, *Sol. RRL*, , DOI:10.1002/solr.201900197.
- 6 A. K. Kadhim, M. R. Mohammad and A. I. Abd Ali, Enhancing the efficiency of perovskite solar cells by modifying perovskite layer with rGO additive, *Chem. Phys. Lett.*, 2022, **786**, 2–6.
  - 7 X. Fang, J. Ding, N. Yuan, P. Sun, M. Lv, G. Ding and C. Zhu, Graphene quantum dot incorporated perovskite films: Passivating grain boundaries and facilitating electron extraction, *Phys. Chem. Chem. Phys.*, 2017, **19**, 6057–6063.
  - 8 S. K. Muduli, E. Varrla, S. A. Kulkarni, G. Han, K. Thirumal, O. Lev, S. Mhaisalkar and N. Mathews, 2D black phosphorous nanosheets as a hole transporting material in perovskite solar cells, *J. Power Sources*, 2017, **371**, 156–161.
  - 9 A. Agresti, S. Pescetelli, A. L. Palma, B. Martín-García, L. Najafi, S. Bellani, I. Moreels, M. Prato, F. Bonaccorso and A. Di Carlo, Two-Dimensional Material Interface Engineering for Efficient Perovskite Large-Area Modules, *ACS Energy Lett.*, 2019, **4**, 1862–1871.
  - 10 S. Suragtkhuu, O. Tserendavag, U. Vandandoo, A. S. R. Bati, M. Bat-Erdene, J. G. Shapter, M. Batmunkh and S. Davaasambuu, Efficiency and stability enhancement of perovskite solar cells using reduced graphene oxide derived from earth-abundant natural graphite, *RSC Adv.*, 2020, **10**, 9133–9139.
  - 11 T. H. Chowdhury, M. Akhtaruzzaman, M. E. Kayesh, R. Kaneko, T. Noda, J. J. Lee and A. Islam, Low temperature processed inverted planar perovskite solar cells by r-GO/CuSCN hole-transport bilayer with improved stability, *Sol. Energy*, 2018, **171**, 652–657.
  - 12 W. Chen, K. Li, Y. Wang, X. Feng, Z. Liao, Q. Su, X. Lin and Z. He, Black Phosphorus Quantum Dots for Hole Extraction of Typical Planar Hybrid Perovskite Solar Cells, *J. Phys. Chem. Lett.*, 2017, **8**, 591–598.
